# Supplementary material for: Syndioselective coordination polymerization of unmasked polar methoxystyrenes using a pyridenylmethylene fluorenyl yttrium precursor
Source: Royal Society of Chemistry journal article supplement (doi:10.1039/c5cc00470e), 2015-01-01
Supplement: c5cc00470e1.pdf [file c5cc00470e1.pdf]

Support information

Syndioselective Coordination Polymerization of the Unmasking Polar  
Methoxystyrenes Using Pyridenylmethylene Fluorenyl Yttrium Precursor

Dongtao Liu,<sup>a,#</sup> Rong Wang,<sup>b,#</sup> Meiyang Wang,<sup>c</sup> Chunji Wu,<sup>a</sup> Zichuan Wang,<sup>a</sup> Changguang Yao,<sup>a</sup> Bo Liu,<sup>a</sup> Xinhua Wan,<sup>\*b</sup> Dongmei Cui<sup>\*a</sup>

<sup>a</sup> State Key Laboratory of Polymer Physics and Chemistry, Changchun Institute of Applied Chemistry, Chinese Academy of Sciences, Changchun 130022, China.

<sup>b</sup> Beijing National Laboratory for Molecular Sciences, Key Laboratory of Polymer Chemistry and Physics of Ministry of Education, College of Chemistry and Molecular Engineering, Peking University, Beijing 100871, China

<sup>c</sup> Institute of Theoretical Chemistry, State Key Laboratory of Theoretical and Computational Chemistry, Jilin University, Changchun 130022, People's Republic of China.

# The first two authors contributed equally to this paper.

Corresponding to E-mail: [dmcui@ciac.ac.cn](mailto:dmcui@ciac.ac.cn) and [xhwan@pku.edu.cn](mailto:xhwan@pku.edu.cn)

**Experimental Section**

**General Considerations.** All manipulations were performed under a dry and oxygen-free argon atmosphere using standard high vacuum Schlenk techniques or in a glove box. All solvents were purified via a solvent purification system. The *ortho*-methoxystyrene (*o*MOS), *meta*-methoxystyrene (*m*MOS), *para*-methoxystyrene (*p*MOS), and styrene (St) were purchased from Aldrich and dried over CaH<sub>2</sub> under stirring for 48 hours and distilled before use. Aluminum alkyls were purchased from Aldrich and used without further purification. The pyridyl methylene fluorenyl yttrium complex **1**<sup>1</sup> and phenyl methylene fluorenyl ligand<sup>2</sup> were prepared according to the reported methods. Organometallic samples for NMR spectroscopic measurements were prepared in the glove box by use of NMR tubes sealed by paraffin film. <sup>1</sup>H, <sup>13</sup>C NMR spectra were recorded on a Bruker AV400 (FT, 400 MHz for <sup>1</sup>H; 100 MHz for <sup>13</sup>C) or AV500 (FT, 500 MHz for <sup>1</sup>H; 125 MHz for <sup>13</sup>C). NMR assignments were confirmed by <sup>1</sup>H-<sup>13</sup>C HMQC experiments when necessary. The molecular weight (*M<sub>n</sub>*) and molecular weight distribution of the polymers were measured by means of gel permeation chromatography (GPC) on a PL-GPC 220 type high-temperature chromatography equipped with three PL-gel 10 μm Mixed-B LS type columns at 150 °C. Differential scanning calorimetry (DSC) analyses were carried out on a DSC 1 from METTLER-TOLEDO Instruments under a nitrogen atmosphere at a heating rate of 10 °C/min. The thermal history difference in the polymers was eliminated by first heating the specimen to 300 °C, cooling at 10 °C/min to 25 °C, and then recording the second DSC scan.

**Synthesis of Complex (Ph-CH<sub>2</sub>-Flu)Y(CH<sub>2</sub>SiMe<sub>3</sub>)<sub>2</sub>(THF) (2).** Under a nitrogen atmosphere, to a hexane solution (5 mL) of Y(CH<sub>2</sub>SiMe<sub>3</sub>)<sub>3</sub>(THF)<sub>2</sub> (0.495 g, 1.0 mmol), 1 equiv of Ph-CH<sub>2</sub>-FluH (0.256 g, 1.0 mmol) was added slowly at -30 °C. The mixture was stirred for 4 h to afford a dark red solution. Evaporation of the solvent left **2** as yellow solids (Scheme S1)(0.21 g, 35%). <sup>1</sup>H NMR (500 MHz, C<sub>6</sub>D<sub>6</sub>, 25 °C): δ -1.00 (br, 4H, Y-CH<sub>2</sub>SiMe<sub>3</sub>), 0.21 (s, 18H, CH<sub>2</sub>SiMe<sub>3</sub>), 1.22 (br, 4H, THF), 3.52 (br, 4H, THF), 4.69 (s, 2H,

Flu-CH<sub>2</sub>-Ph), 6.95–7.03 (m, 7H, Flu, Ph), 7.15 (2H, Flu), 7.63 (d, <sup>3</sup>J<sub>H-H</sub> = 8.5 Hz, 2H, Flu), 7.93 (d, <sup>3</sup>J<sub>H-H</sub> = 8.0 Hz, 2H, Flu). <sup>13</sup>C NMR (125 MHz, C<sub>6</sub>D<sub>6</sub>, 25 °C): δ 4.74 (s, 6C, CH<sub>2</sub>SiMe<sub>3</sub>), 25.45 (br, 2C, THF), 39.09 (d, 2C, J<sub>Y-C</sub> = 43.7 Hz, Y-CH<sub>2</sub>SiMe<sub>3</sub>), 70.48 (br, 2C, THF), 97.37 (s, 1C, Flu-CH<sub>2</sub>-Ph), 118.50, 118.80, 120.14, 122.65, 125.88, 126.45, 128.90, 129.02, 132.68, 142.55 (19C, Flu, Ph).

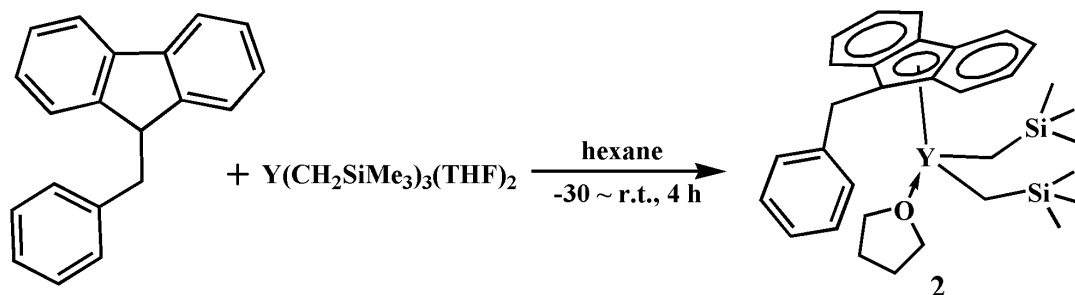

**Scheme S1.** Synthesis of complex 2

**Typical Procedure for Polymerization of *p*MOS.** A detailed polymerization procedure is described as following (Table 1, run 2): Under a nitrogen atmosphere and room temperature, complex 1 (5.9 mg, 1.0×10<sup>-5</sup> mol, 0.8 mL toluene) and 10 equiv. of Al<sup>*i*</sup>Bu<sub>3</sub> (0.2 ml, 1.0×10<sup>-4</sup> mol, 0.5 M in toluene) were added into a 10 mL flask. Then 1 equiv of [Ph<sub>3</sub>C][B(C<sub>6</sub>F<sub>5</sub>)<sub>4</sub>] (9.2 mg, 1.0×10<sup>-5</sup> mol) was added under stirring to give a yellow solution after several minutes. Upon the addition of *p*MOS (0.20 g, 1.5 mmol), polymerization was initiated and carried out for 30 min. The reaction mixture was poured into a large quantity of methanol and then dried under vacuum at 50 °C to a constant weight (0.15 g, 75%).

### Computational Details

The natural bond orbital (NBO) analysis<sup>3</sup> was made using larger basis set 6-311G(d,p) for all the main group atoms.

### Reference:

1. Pan, Y. P.; Rong, W. F.; Jian, Z. B.; Cui, D. M., *Macromolecules* **2012**, *45*, 1248.
2. Fleckenstein, C. A.; Plenio, H. *Chem. Eur. J.* **2007**, *13*, 2701.
3. Glendening, E. D.; Reed, A. E.; Carpenter, J. E.; Weinhold, F. NBO Version 3.1.

## Legends

**Figure S1.**  $^1\text{H}$  NMR spectrum of syndiotactic P(*p*MOS) ( $\text{CDCl}_3$ ,  $25^\circ\text{C}$ )

**Figure S2**  $^1\text{H}$ - $^{13}\text{C}$  COSY spectrum of syndiotactic P(*p*MOS) ( $\text{CDCl}_3$ ,  $25^\circ\text{C}$ )

**Figure S3.**  $^{13}\text{C}$  NMR spectrum of syndiotactic P(*p*MOS) ( $\text{CDCl}_3$ ,  $25^\circ\text{C}$ )

**Figure S4.**  $^1\text{H}$  NMR spectrum of syndiotactic P(*m*MOS) ( $\text{CDCl}_3$ ,  $25^\circ\text{C}$ )

**Figure S5**  $^1\text{H}$ - $^{13}\text{C}$  COSY spectrum of syndiotactic P(*m*MOS) ( $\text{CDCl}_3$ ,  $25^\circ\text{C}$ )

**Figure S6.**  $^{13}\text{C}$  NMR spectrum of syndiotactic P(*m*MOS) ( $\text{CDCl}_3$ ,  $25^\circ\text{C}$ )

**Figure S7.**  $^{13}\text{C}$  NMR spectrum of syndiotactic P(*o*MOS) ( $\text{C}_2\text{Cl}_4\text{D}_2$ ,  $120^\circ\text{C}$ )

**Figure S8.** The possible mechanisms for the syndioselective polymerizations of *o*MOS (a), *m*MOS (b) and *p*MOS (c) by complex **1**/ $\text{Al}^i\text{Bu}_3$ / $[\text{Ph}_3\text{C}][\text{B}(\text{C}_6\text{F}_5)_4]$ .

**Figure S9.** NBO charge of the monomers. (a) St; (b) *o*MOS; (c) *m*MOS; (d) *p*MOS

**Figure S10.** Probable insertion mechanism of methoxystyrenes.

**Table S1.** Polymerization of methoxystyrenes by complex **2**.

**Figure S11.** GPC curve of syndiotactic P(*p*MOS) (Table 1, entry 2).

**Figure S12.** GPC curve of syndiotactic P(*m*MOS) (Table 1, entry 4).

**Figure S13.** GPC curve of syndiotactic P(*o*MOS) (Table 1, entry 6).

**Figure S14.** DSC curve of syndiotactic P(*o*MOS) (Table 1, entry 6)

**Figure S15.** DSC curve of syndiotactic P(*m*MOS) (Table 1, entry 4)

**Figure S16.** DSC curve of syndiotactic P(*p*MOS) (Table 1, entry 2)

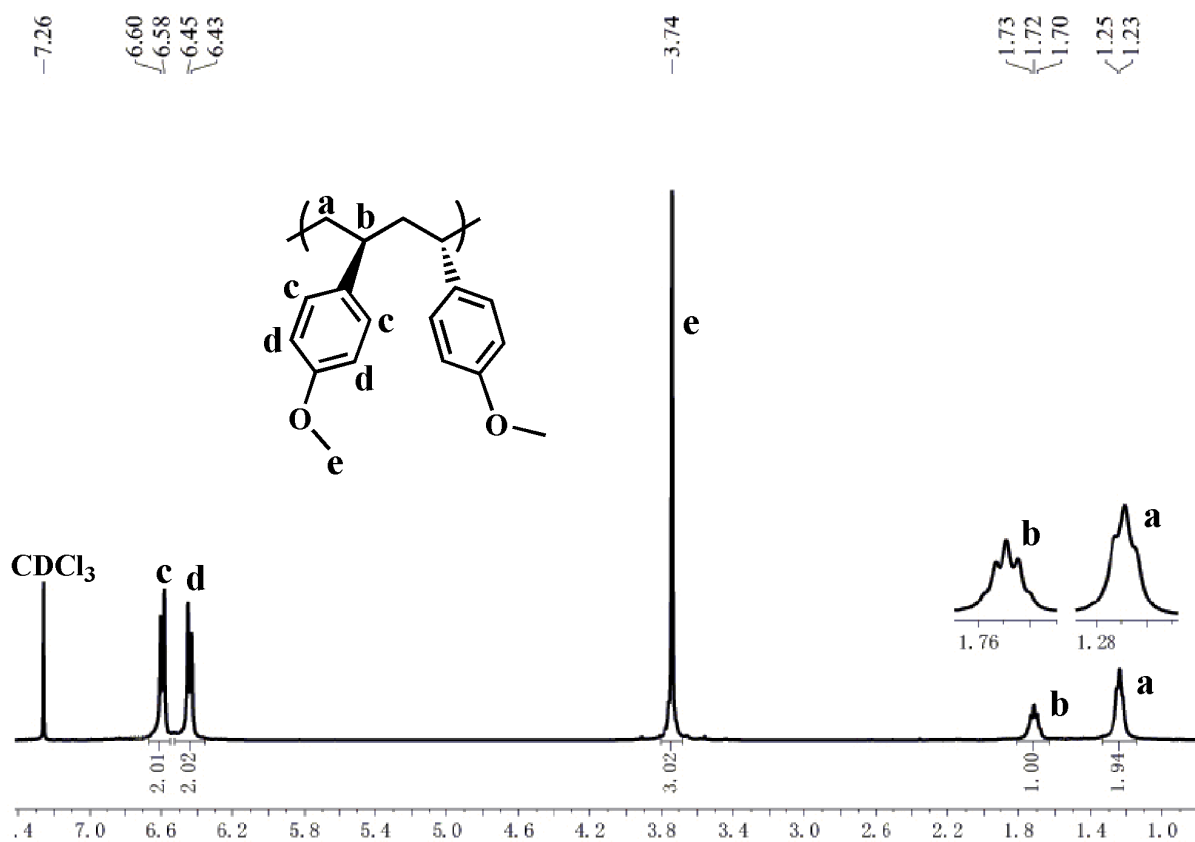

**Figure S1.**  $^1\text{H}$  NMR spectrum of syndiotactic P(*p*MOS) ( $\text{CDCl}_3$ ,  $25^\circ\text{C}$ )

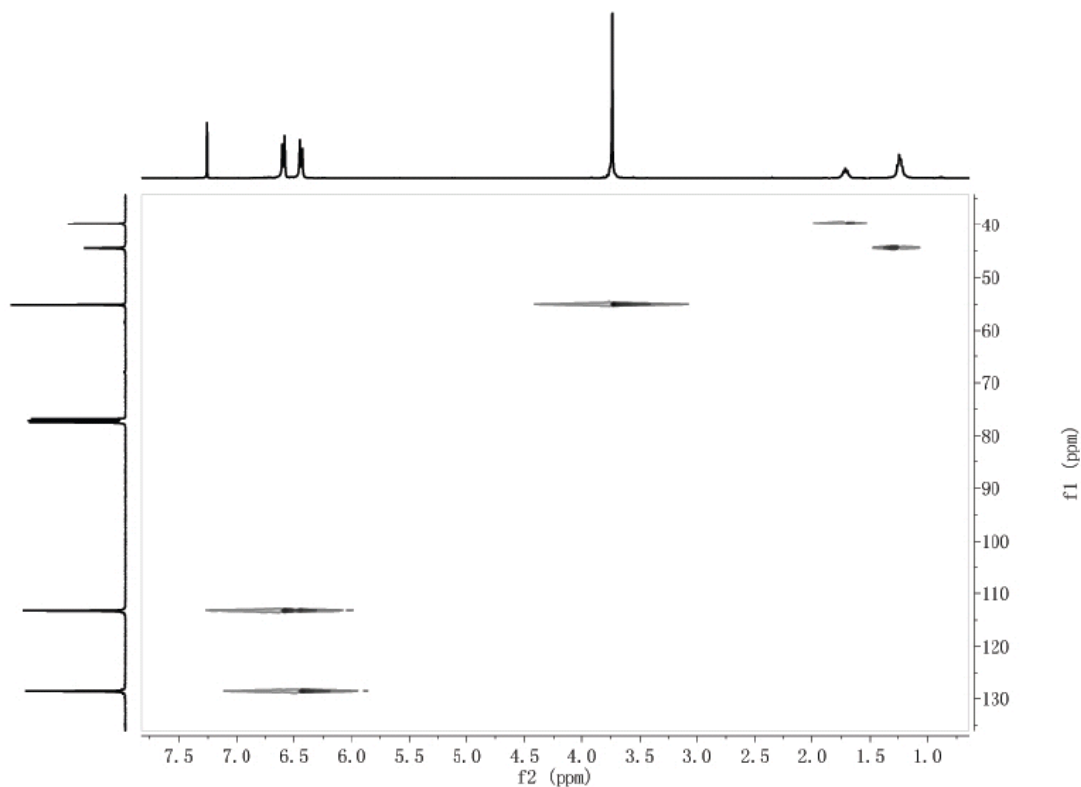

**Figure S2**  $^1\text{H}$ - $^{13}\text{C}$  COSY spectrum of syndiotactic P(*p*MOS) ( $\text{CDCl}_3$ ,  $25^\circ\text{C}$ )

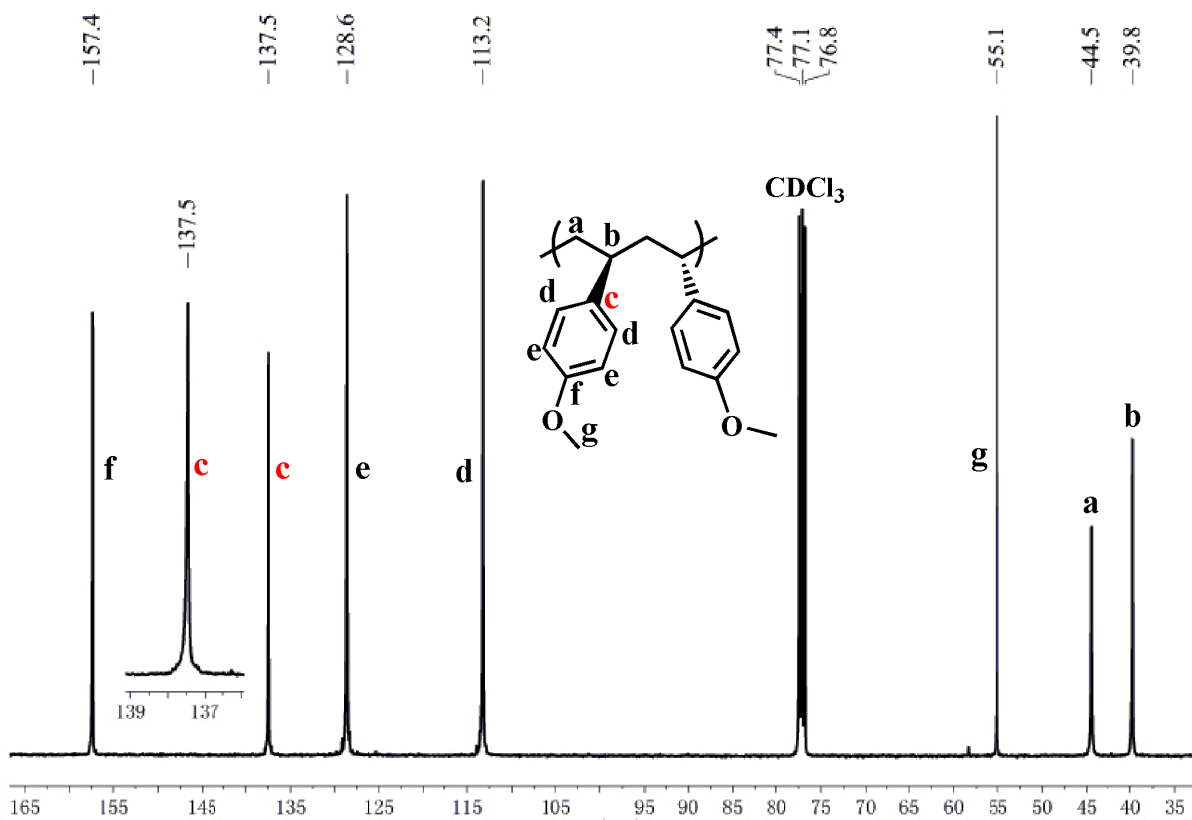

**Figure S3.**  $^{13}\text{C}$  NMR spectrum of syndiotactic P(*p*MOS) ( $\text{CDCl}_3$ ,  $25^\circ\text{C}$ )

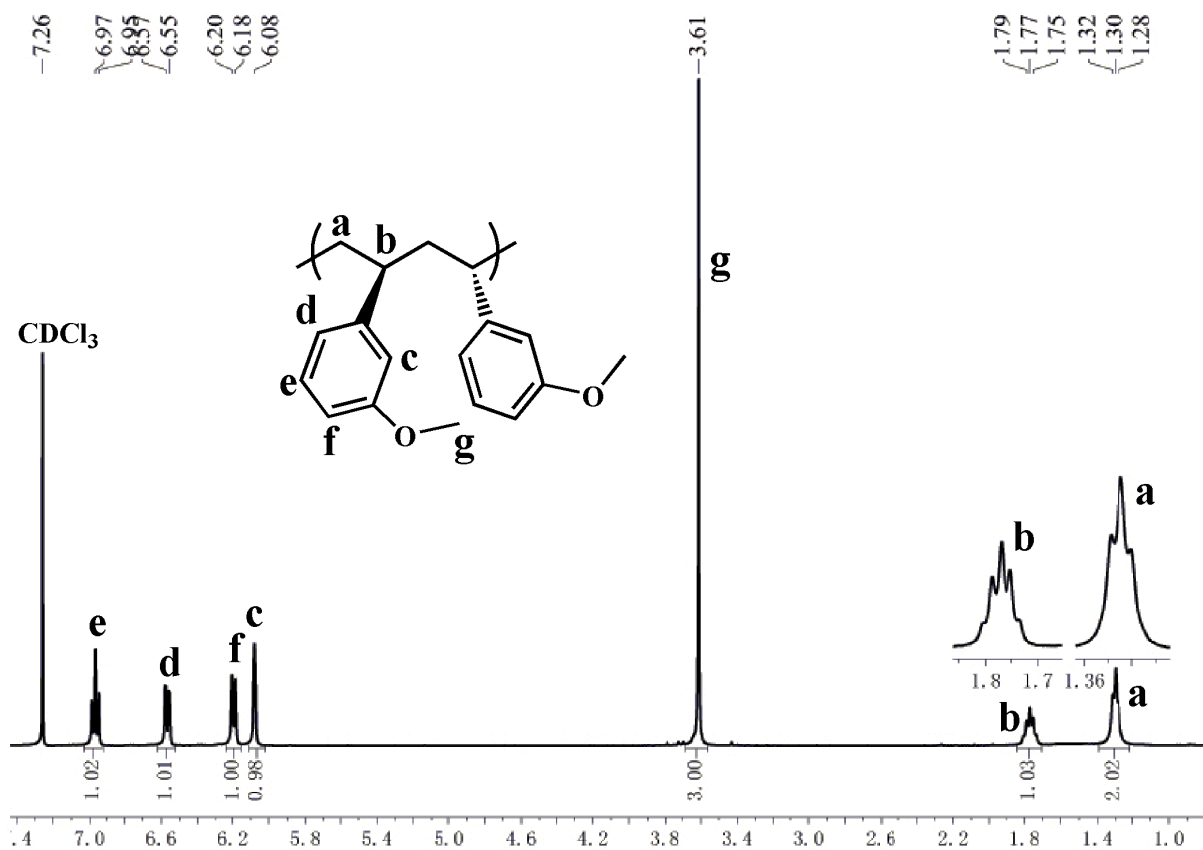

**Figure S4.** <sup>1</sup>H NMR spectrum of syndiotactic P(*m*MOS) (CDCl<sub>3</sub>, 25 °C)

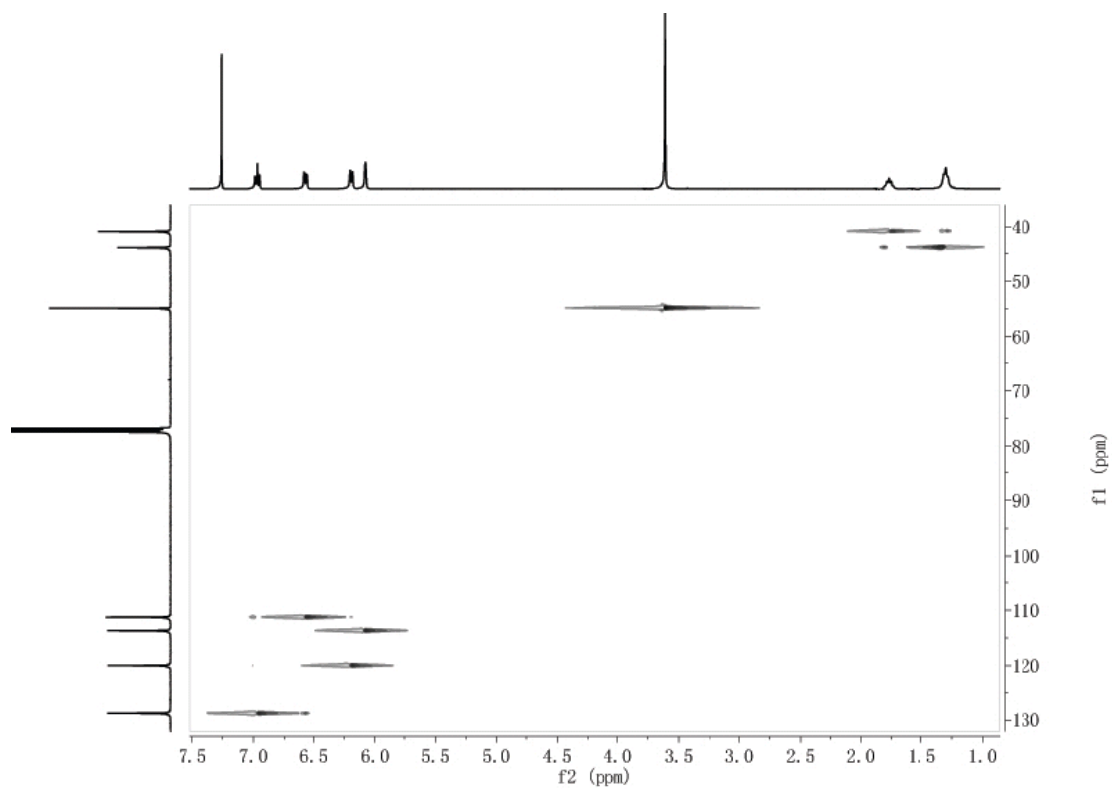

**Figure S5** <sup>1</sup>H-<sup>13</sup>C COSY spectrum of syndiotactic P(*m*MOS) (CDCl<sub>3</sub>, 25 °C)

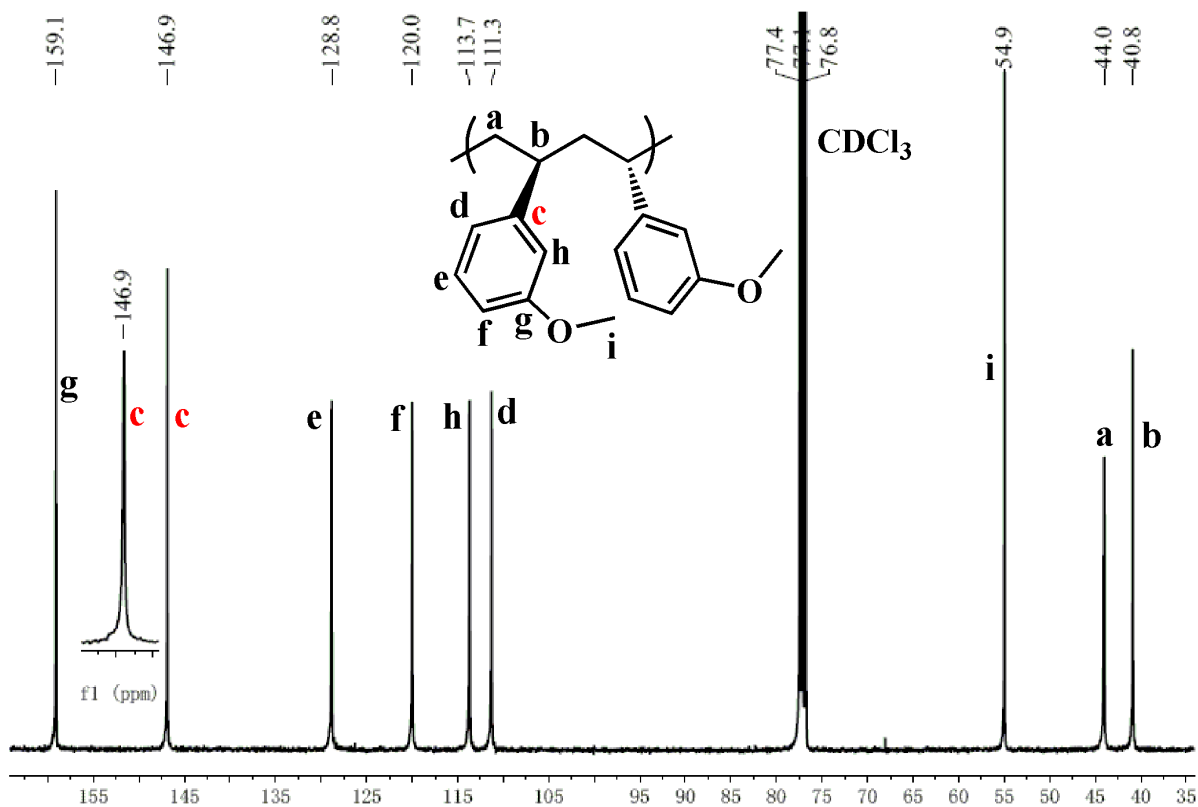

**Figure S6.** <sup>13</sup>C NMR spectrum of syndiotactic P(*m*MOS) (CDCl<sub>3</sub>, 25°C)

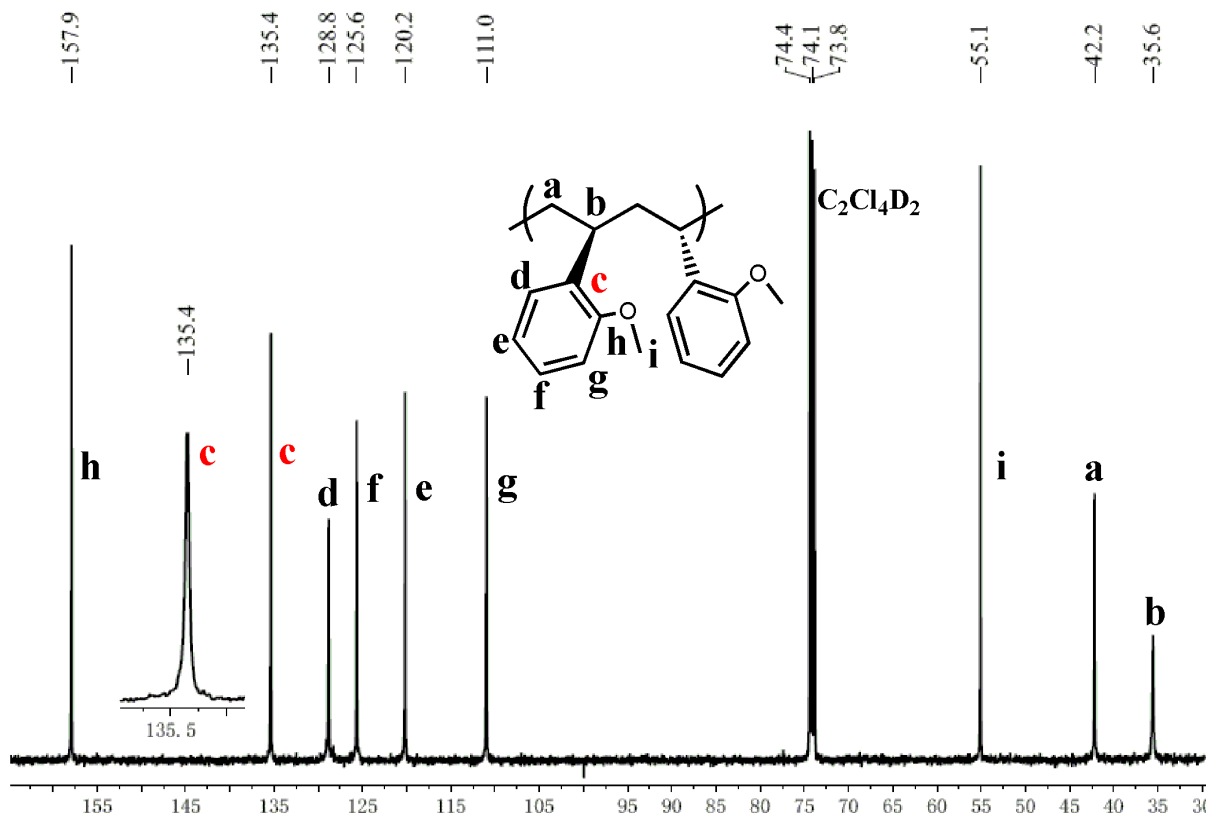

**Figure S7.** <sup>13</sup>C NMR spectrum of syndiotactic P(*o*MOS) (C<sub>2</sub>Cl<sub>4</sub>D<sub>2</sub>, 120°C)

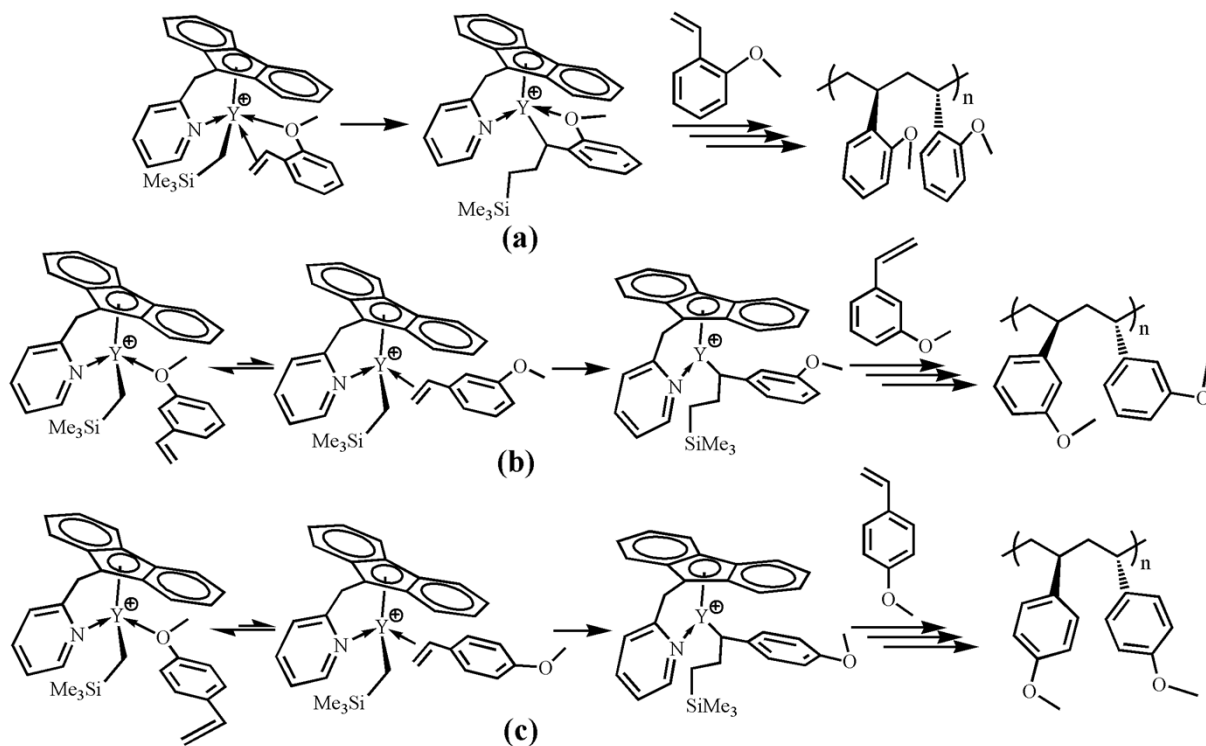

**Figure S8.** The possible mechanisms for the syndiospecific polymerizations of *o*MOS (a), *m*MOS (b) and *p*MOS (c) by complex 1/Al<sup>*i*</sup>Bu<sub>3</sub>/[Ph<sub>3</sub>C][B(C<sub>6</sub>F<sub>5</sub>)<sub>4</sub>].

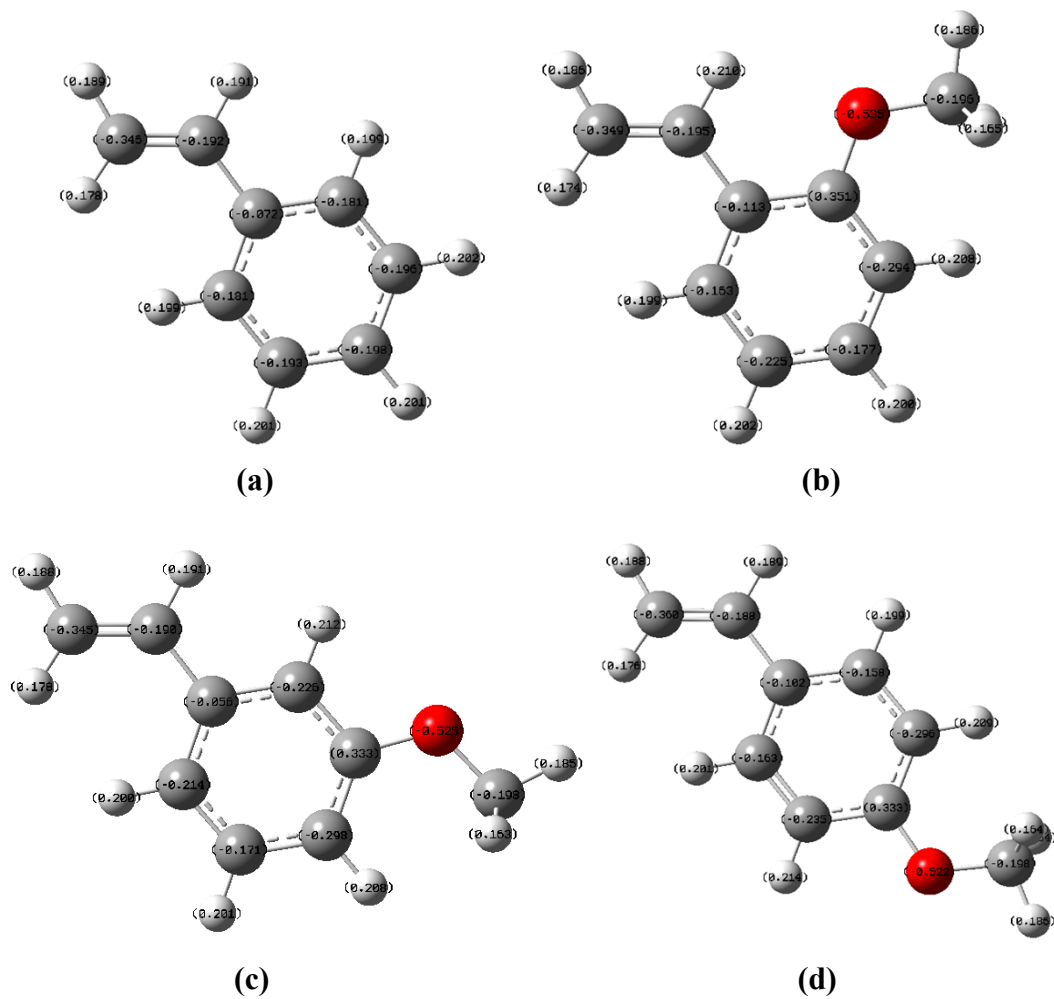



|                               | St     | <i>o</i> MOS | <i>m</i> MOS | <i>p</i> MOS |
|-------------------------------|--------|--------------|--------------|--------------|
| CH (vinyl group)              | -0.192 | -0.195       | -0.190       | -0.188       |
| CH <sub>2</sub> (vinyl group) | -0.345 | -0.349       | -0.345       | -0.360       |

**Figure S9.** NBO charge of the monomers. (a) St; (b) *o*MOS; (c) *m*MOS; (d) *p*MOS

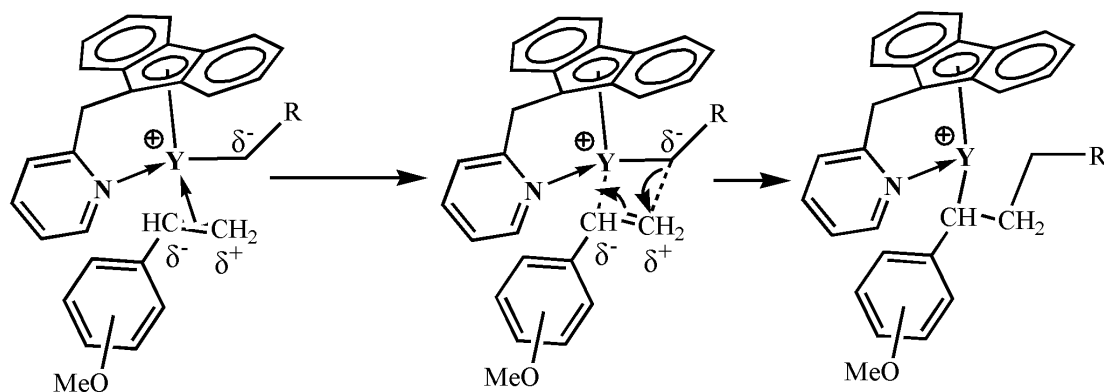

**Figure S10.** Probable insertion mechanism of methoxystyrenes.

**Table S1.** Polymerization of methoxystyrenes by complex **2**.

| entry | Monomer      | [M]/[Y] | time (min) | Yield (g) | $M_n^b$ ( $/10^{-4}$ ) | $M_w/M_n^b$ | $T_g/T_m^c$ ( $^{\circ}\text{C}$ ) |
|-------|--------------|---------|------------|-----------|------------------------|-------------|------------------------------------|
| 1     | <i>p</i> MOS | 300     | 120        | trace     | -                      | -           | -                                  |
| 2     | <i>m</i> MOS | 300     | 120        | trace     | -                      | -           | -                                  |
| 3     | <i>o</i> MOS | 300     | 120        | 0.38      | 5.99                   | 1.26        | 85/234                             |

<sup>a</sup> General condition:  $10^{-5}$  mol of Y complex; in toluene; [Al] = Al<sup>i</sup>Bu<sub>3</sub>; [Al]/[Y] = 10; [Ph<sub>3</sub>C][B(C<sub>6</sub>F<sub>5</sub>)<sub>4</sub>] / [Y] = 1; [monomer]<sub>0</sub> = 2.0 mol/L. <sup>b</sup> Determined by GPC in 1,2,4-trichlorobenzene at 150  $^{\circ}\text{C}$  against polystyrene standard. <sup>c</sup> Determined by DSC.

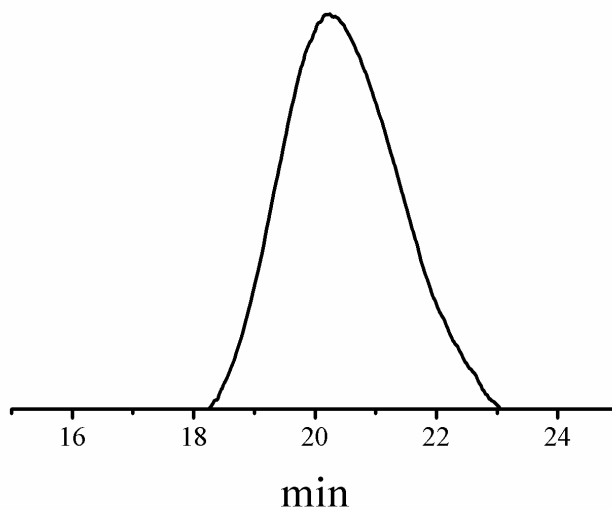

**Figure S11.** GPC curve of syndiotactic P(*p*MOS) (Table 1, entry 2).

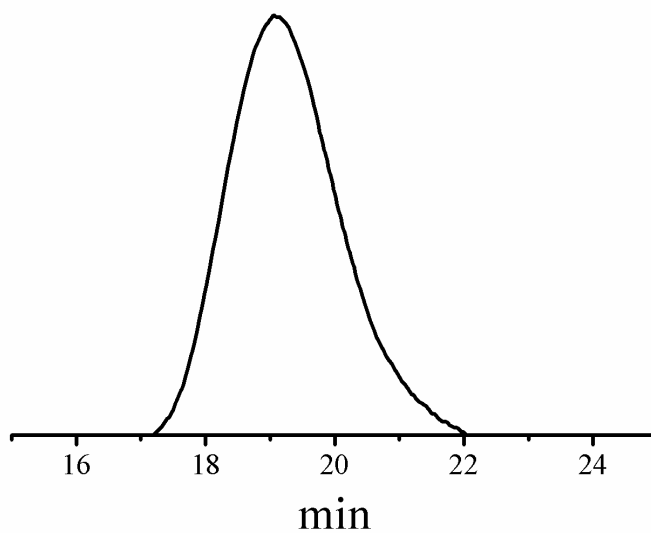

**Figure S12.** GPC curve of syndiotactic P(*m*MOS) (Table 1, entry 4).

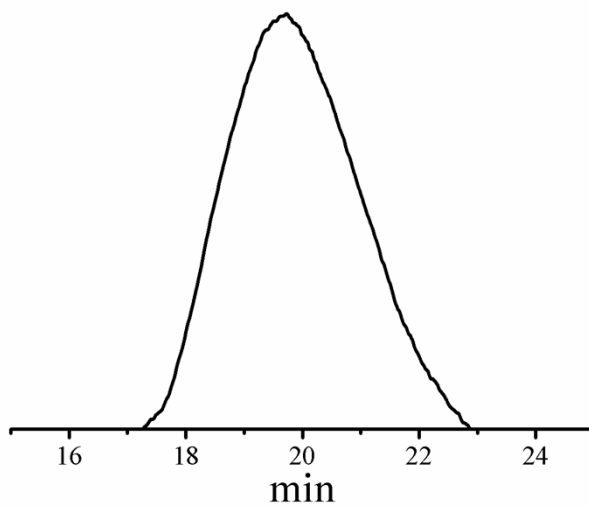

**Figure S13.** GPC curve of syndiotactic P(*o*MOS) (Table 1, entry 6).

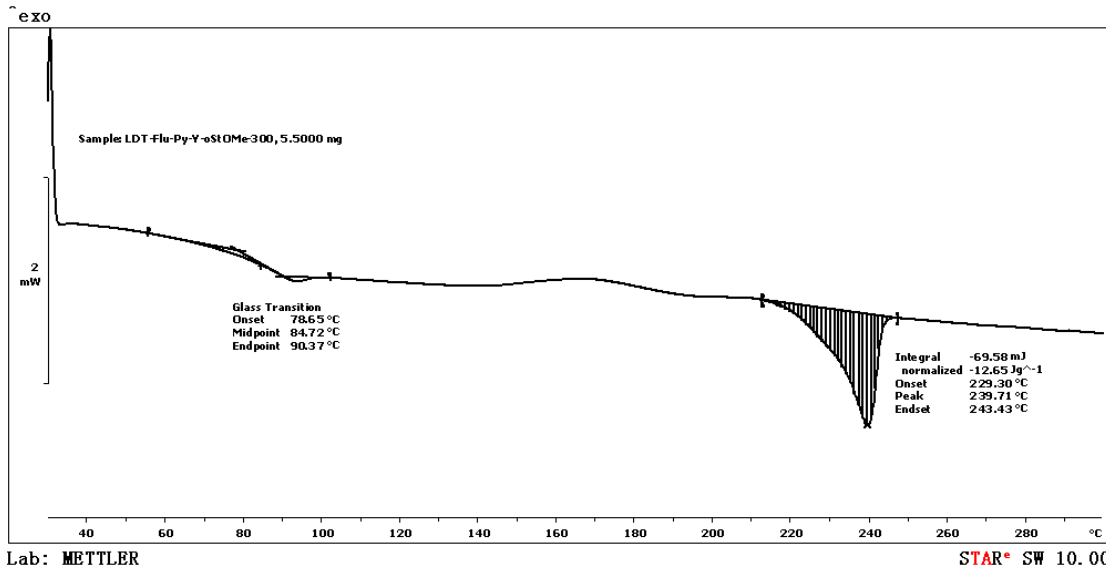

Figure S14. DSC curve of syndiotactic P(oMOS) (Table 1, entry 6)

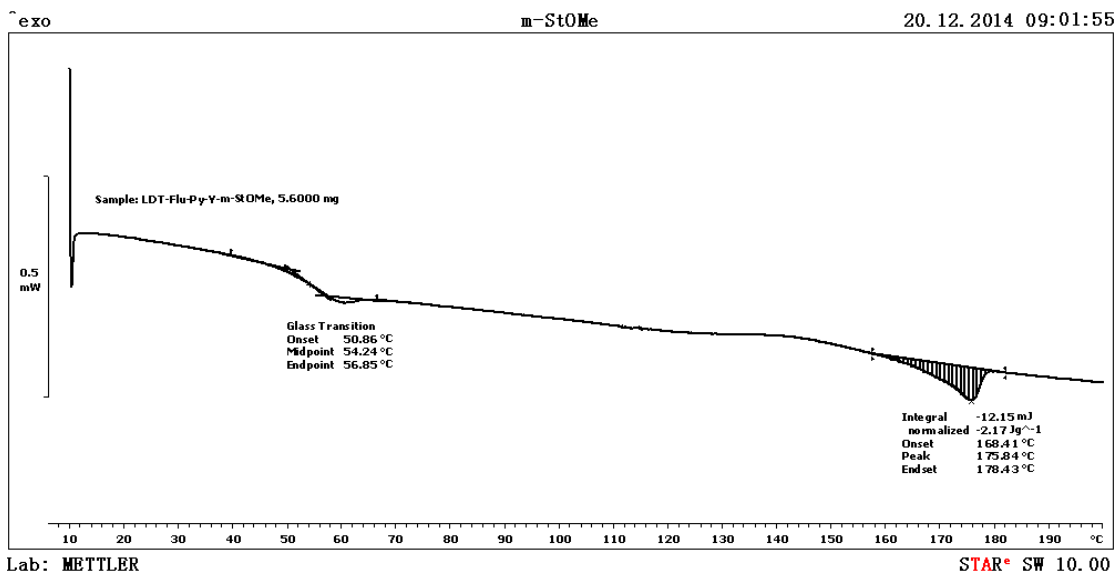

Figure S15. DSC curve of syndiotactic P(mMOS) (Table 1, entry 4)

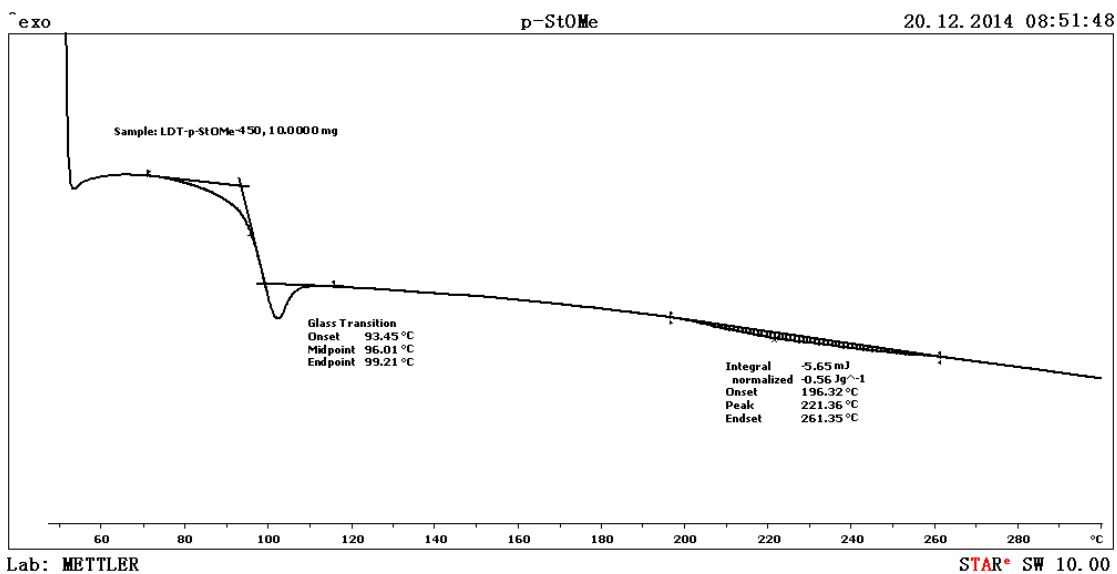

**Figure S16.** DSC curve of syndiotactic P(*p*MOS) (Table 1, entry 2)
